# Supplementary material for: Ni(OH)2 nanodot-decorated Co–Co LDH/C hollow nanocages for a high performance supercapacitor
Source: Royal Society of Chemistry journal article supplement (doi:10.1039/d0dt03237a), 2020-01-01
Supplement: d0dt03237a1.pdf [file d0dt03237a1.pdf]

## **Ni(OH)<sub>2</sub> nanodots decorated Co-Co LDH/C hollow nanocage for high performance supercapacitor**

Yuan Yang<sup>a</sup>, Xiuqin Wang<sup>b</sup>, Feifei Huang<sup>a</sup>, Jialu Zhao<sup>c</sup>, Xiuhua Wang<sup>a\*</sup>

<sup>a</sup>College of Chemistry and Materials Science, Anhui Normal University, The Key Laboratory of Functional Molecular Solids, Ministry of Education, Anhui Laboratory of Molecular-Based Materials, Key Laboratory of Electrochemical Clean Energy of Anhui Higher Education Institutes, Wuhu 241002, China

<sup>b</sup>Shandong Provincial Cancer Hospital and Institute, Jinan 250117, China

<sup>c</sup>Central South University of Forestry and Technology, Changsha 410004, China

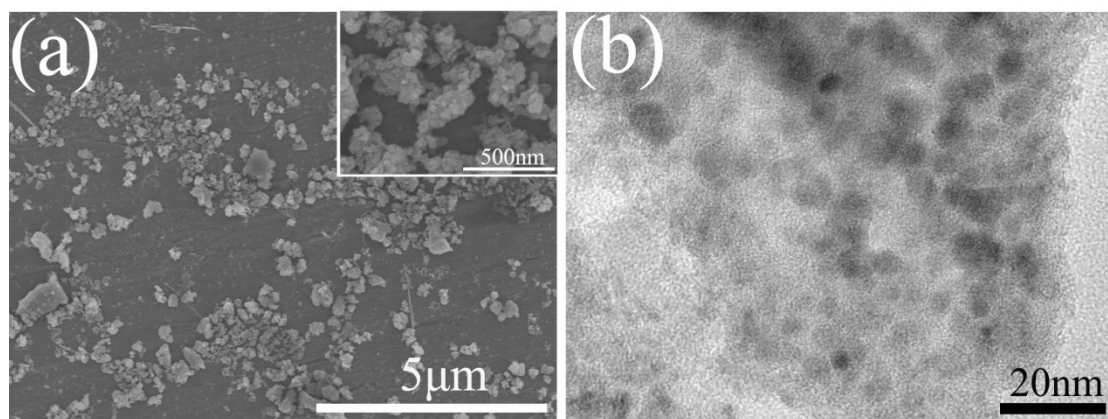

Fig. S1. (a) SEM and (b) TEM images of Ni(OH)<sub>2</sub>.

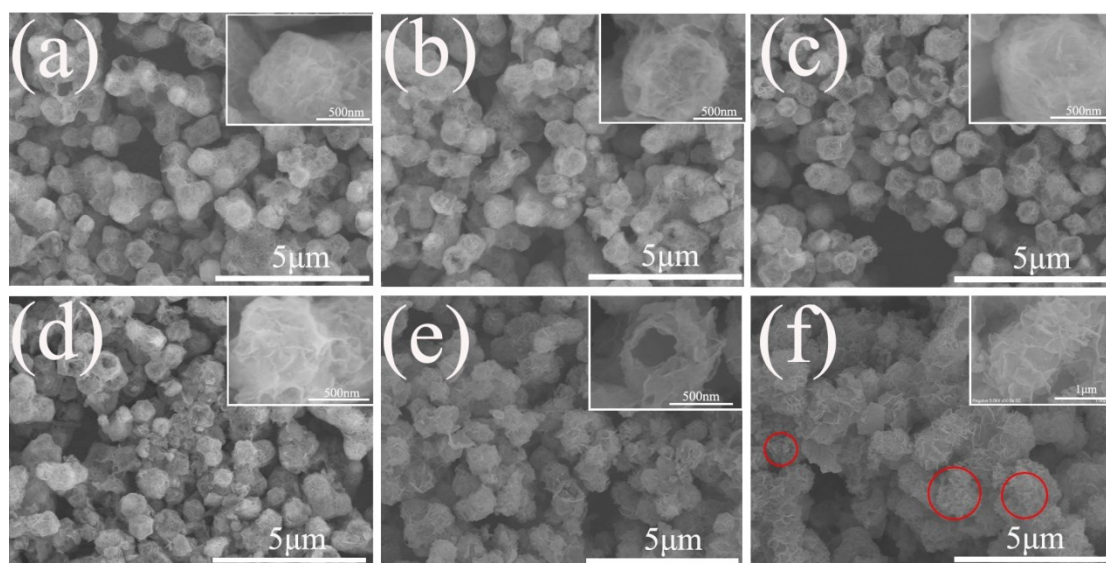

Fig. S2. SEM images of (a) Co-Co LDH/C/Ni(OH)<sub>2</sub>-10, (b) Co-Co LDH/C/Ni(OH)<sub>2</sub>-20, (c) Co-Co LDH/C/Ni(OH)<sub>2</sub>-30, (d) Co-Co LDH/C/Ni(OH)<sub>2</sub>-40, (e) Co-Co LDH/C/Ni(OH)<sub>2</sub>-50 and (f) Co-Co LDH/C/Ni(OH)<sub>2</sub>-60.

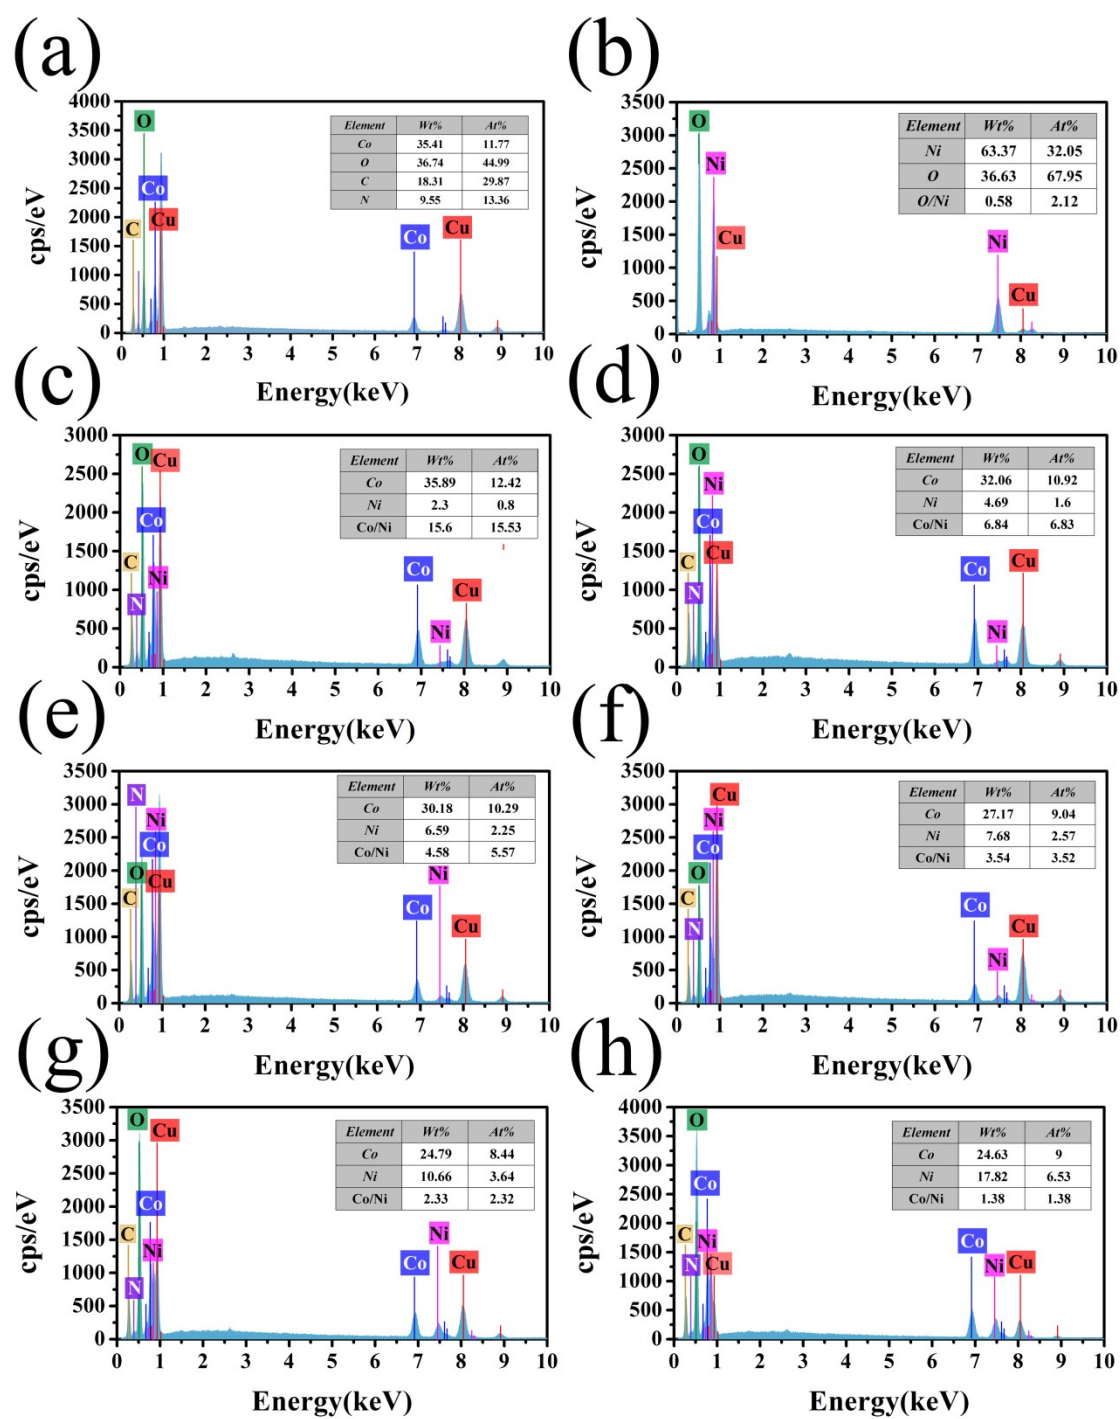

Fig. S3. EDS spectra of (a) Co-Co LDH/C, (b) Ni(OH)<sub>2</sub>, (c) Co-Co LDH/C/Ni(OH)<sub>2</sub>-10, (d) Co-Co LDH/C/Ni(OH)<sub>2</sub>-20, (e) Co-Co LDH/C/Ni(OH)<sub>2</sub>-30, (f) Co-Co LDH/C/Ni(OH)<sub>2</sub>-40, (g) Co-Co LDH/C/Ni(OH)<sub>2</sub>-50 and (h) Co-Co LDH/C/Ni(OH)<sub>2</sub>-60.

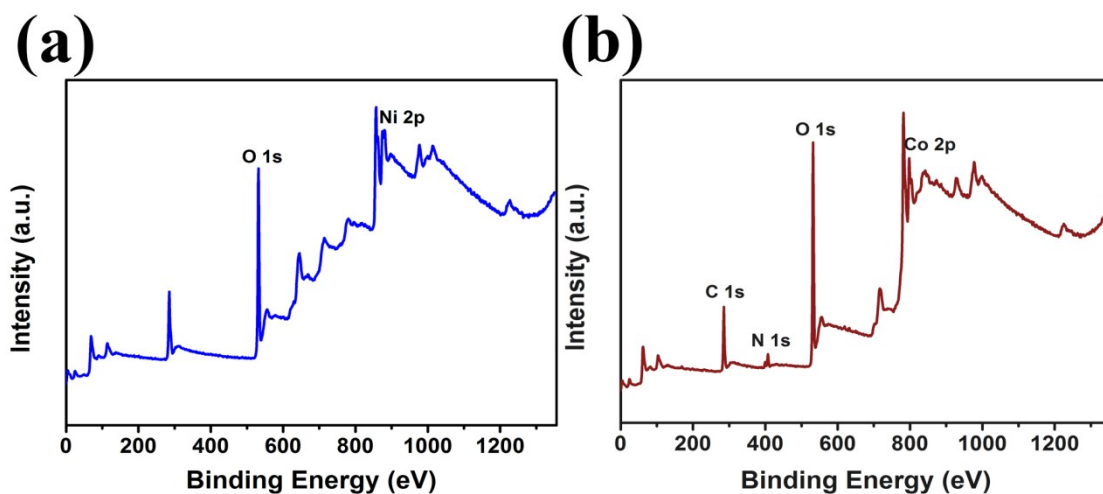

Fig. S4. XPS survey spectra of (a)  $\text{Ni}(\text{OH})_2$  and (b) Co-Co LDH/C.

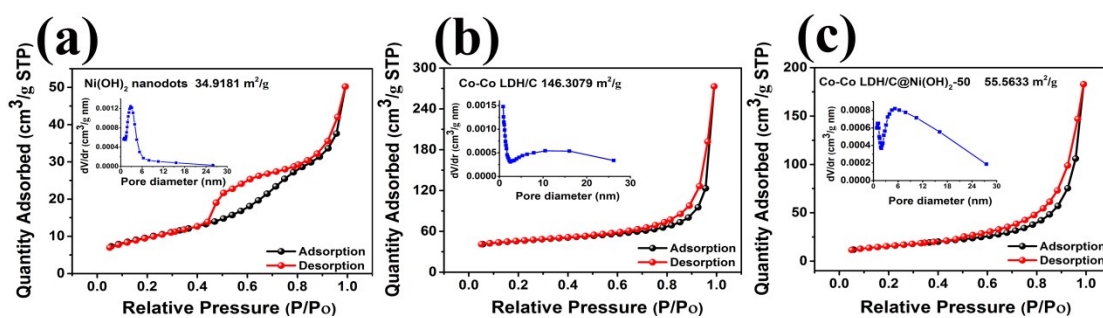

Fig. S5.  $\text{N}_2$  adsorption-desorption isotherms and corresponding pore size distribution plots (inset) of (a)  $\text{Ni}(\text{OH})_2$  nanodots, (b) Co-Co LDH/C and Co-Co LDH/C@ $\text{Ni}(\text{OH})_2$ -50.

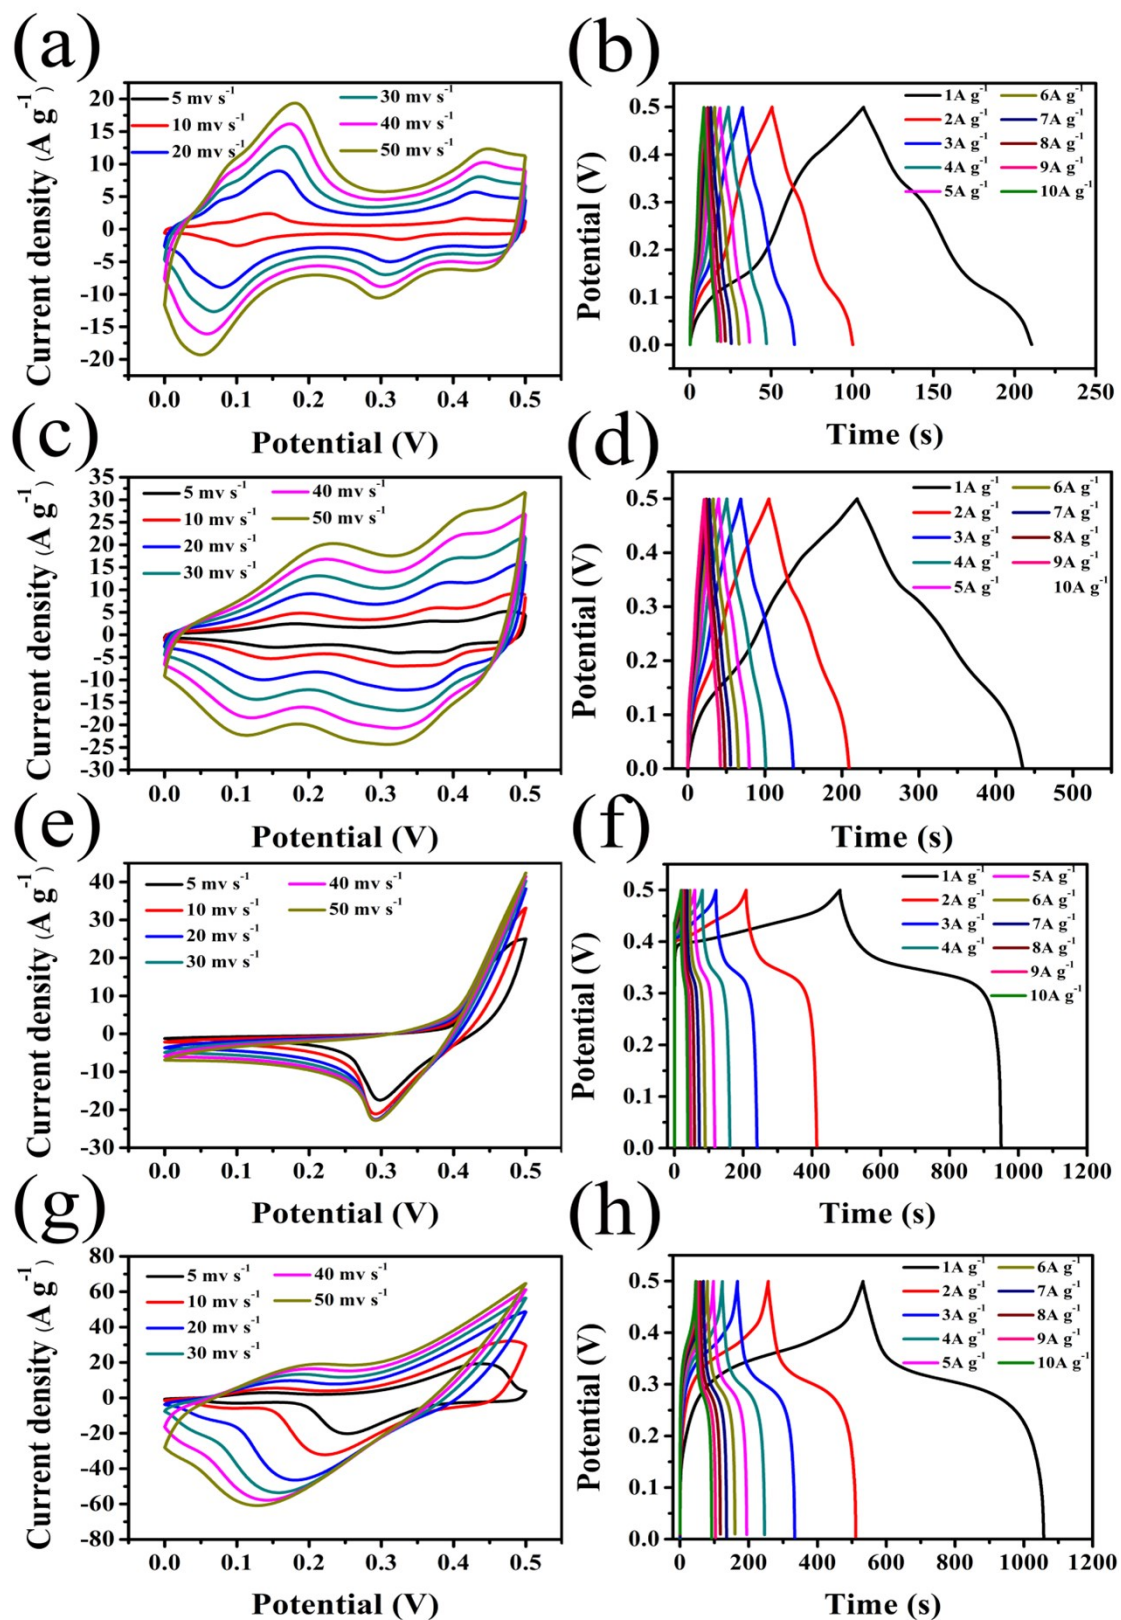

Fig. S6. CV curves at different scanning speeds for (a) Co-Co LDH, (c) Co-Co LDH/C, (e) Ni(OH)<sub>2</sub> and (g) Co-Co LDH/Ni(OH)<sub>2</sub>-50; GCD profiles at various current densities for (b) Co-Co LDH, (d) Co-Co LDH/C, (f) Ni(OH)<sub>2</sub> and (h) Co-Co LDH/Ni(OH)<sub>2</sub>-50.

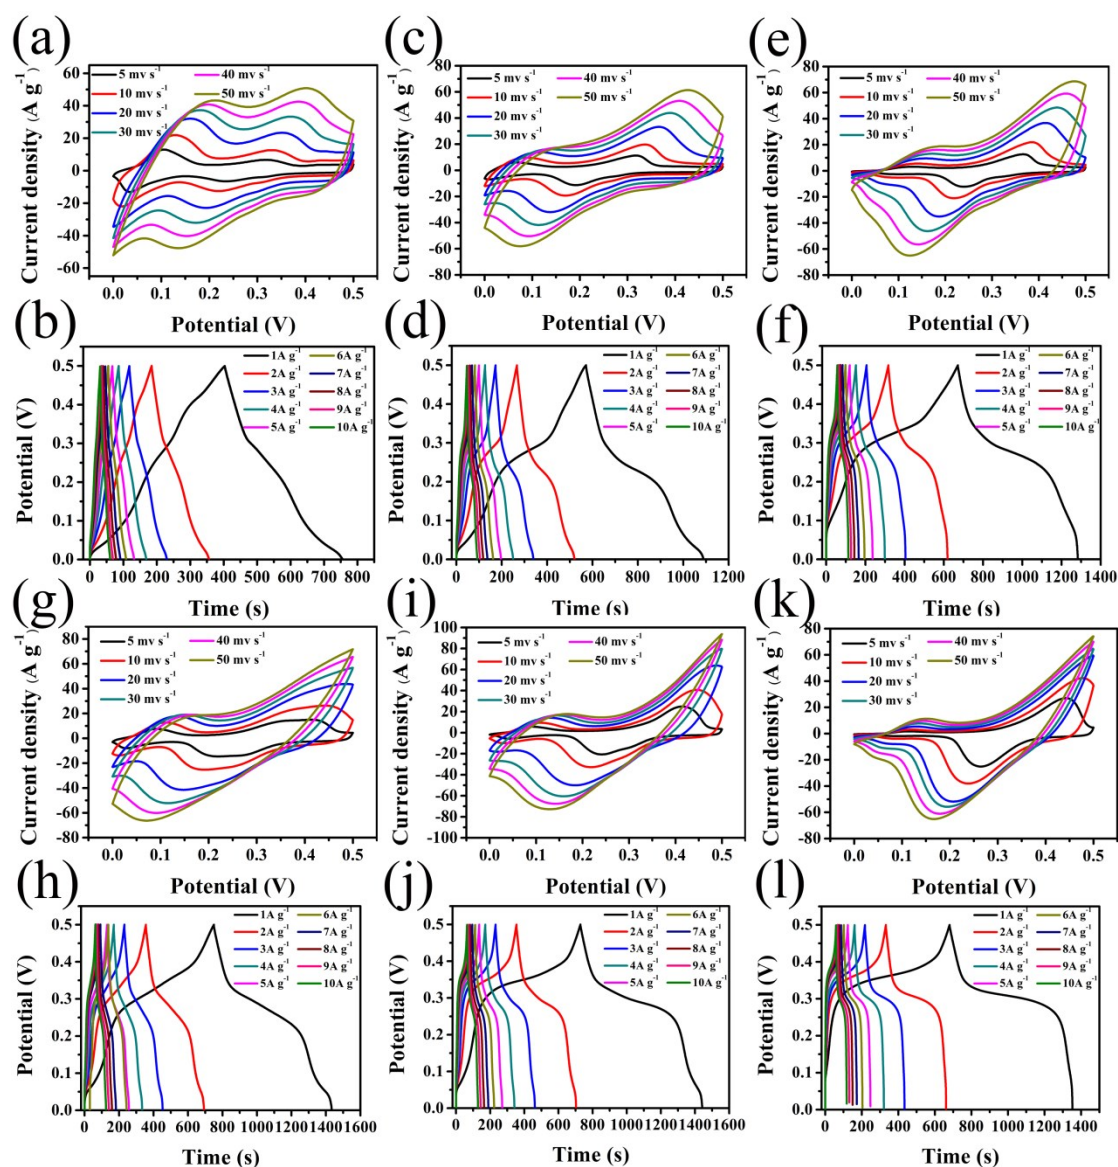

Fig. S7. CV curves at different scanning speeds for (a) Co-Co LDH/Ni(OH)<sub>2</sub>-10, (c) Co-Co LDH/Ni(OH)<sub>2</sub>-20, (e) Co-Co LDH/Ni(OH)<sub>2</sub>-30, (g) Co-Co LDH/Ni(OH)<sub>2</sub>-40, (i) Co-Co LDH/Ni(OH)<sub>2</sub>-50 and (k) Co-Co LDH/Ni(OH)<sub>2</sub>-60; GCD profiles at various current densities for (b) Co-Co LDH/Ni(OH)<sub>2</sub>-10, (d) Co-Co LDH/Ni(OH)<sub>2</sub>-20, (f) Co-Co LDH/Ni(OH)<sub>2</sub>-30, (h) Co-Co LDH/Ni(OH)<sub>2</sub>-40, (j) Co-Co LDH/Ni(OH)<sub>2</sub>-50 and (l) Co-Co LDH/Ni(OH)<sub>2</sub>-60.

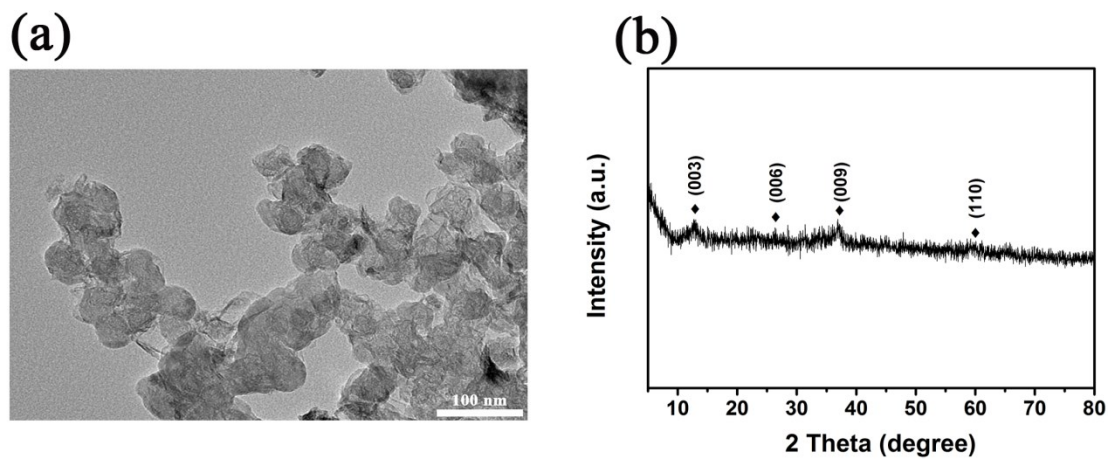

Fig. S8 (a) the TEM image of Co-Co LDH/Ni(OH)<sub>2</sub>-50 electrode after 3000 cycling; (b) the XRD pattern of Co-Co LDH/Ni(OH)<sub>2</sub>-50 electrode after 3000 cycling.

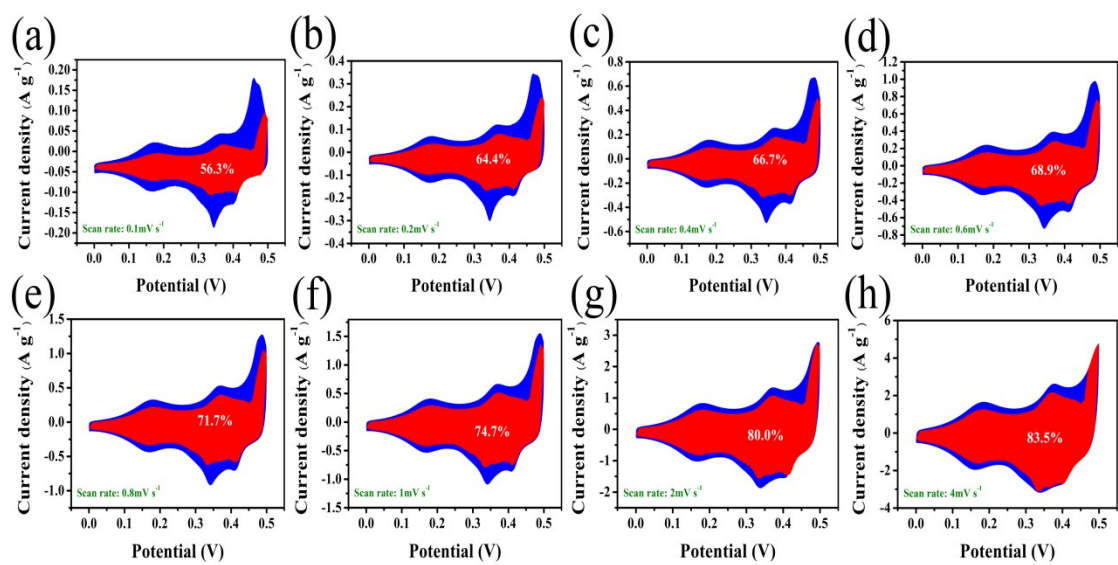

Fig. S9. The capacitive contribution to charge storage of Co-Co LDH at different scan rates of (a) 0.1, (b) 0.2, (c) 0.4, (d) 0.6, (e) 0.8, (f) 1, (g) 2 and (h) 4  $\text{mV s}^{-1}$ .



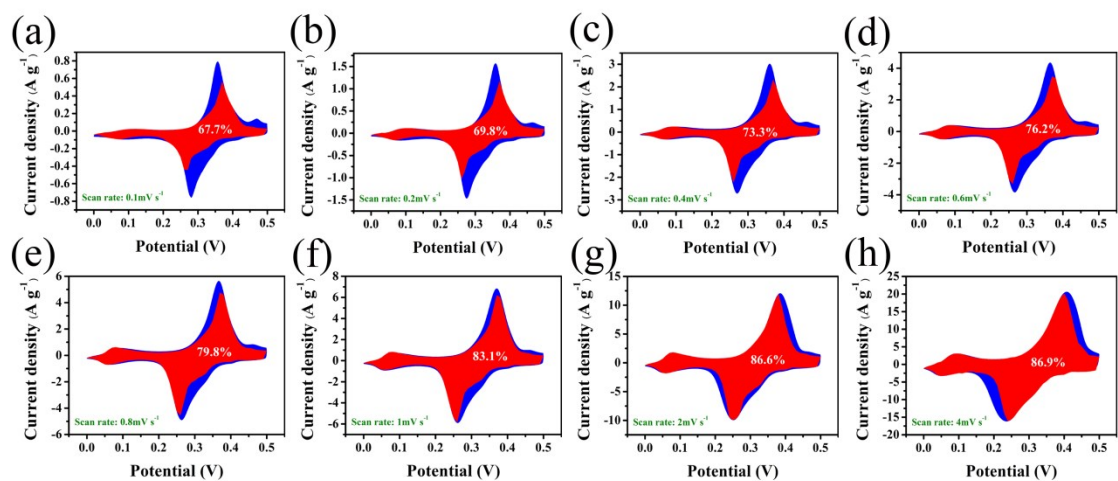

Fig. S10. The capacitive contribution to charge storage of Co-Co LDH/C/Ni(OH)<sub>2</sub>-50 at different scan rates of (a) 0.1, (b) 0.2, (c) 0.4, (d) 0.6, (e) 0.8, (f) 1, (g) 2 and (h) 4  $\text{mV s}^{-1}$ .

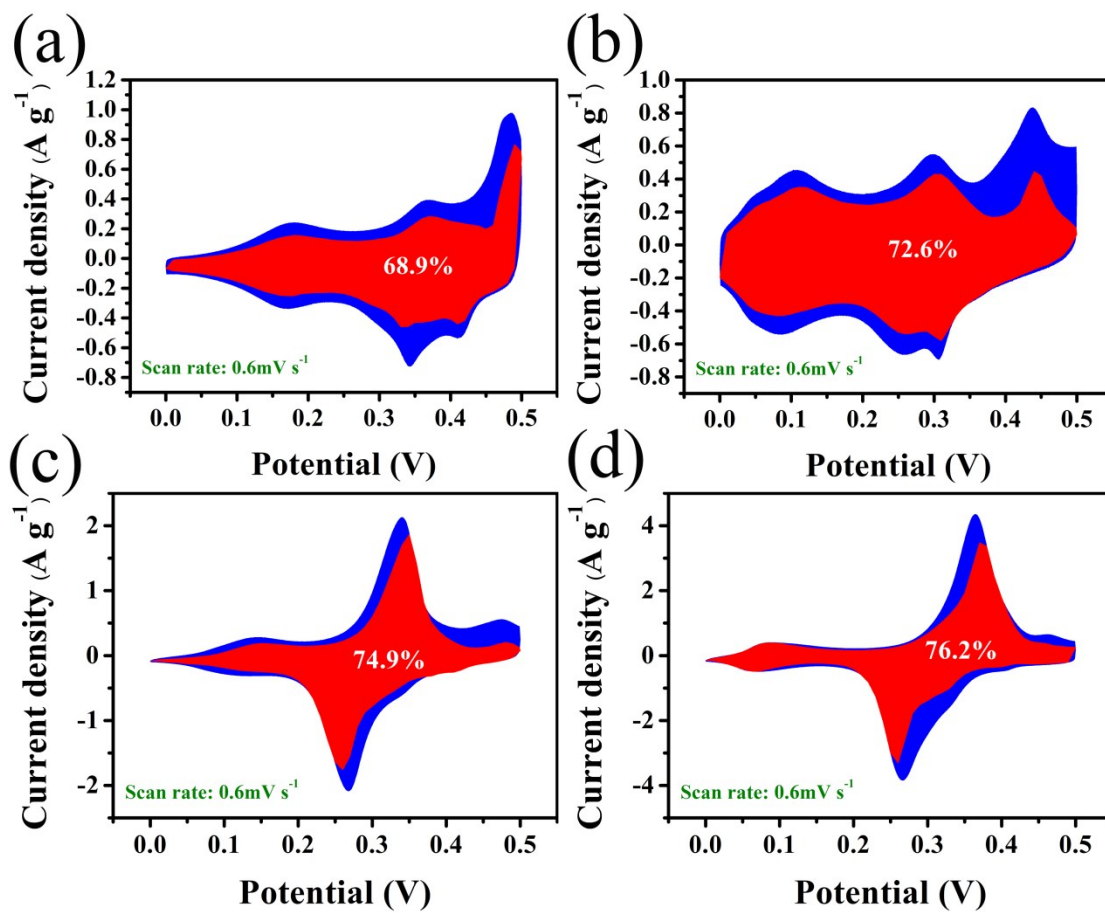

Fig. S11. Capacitive contribution of charge storage of Co-Co LDH/Ni(OH)<sub>2</sub> composites with different Ni(OH)<sub>2</sub> contents (0, 10, 30 and 50 wt.%) at a scan speed of 0.6 mV s<sup>-1</sup>.

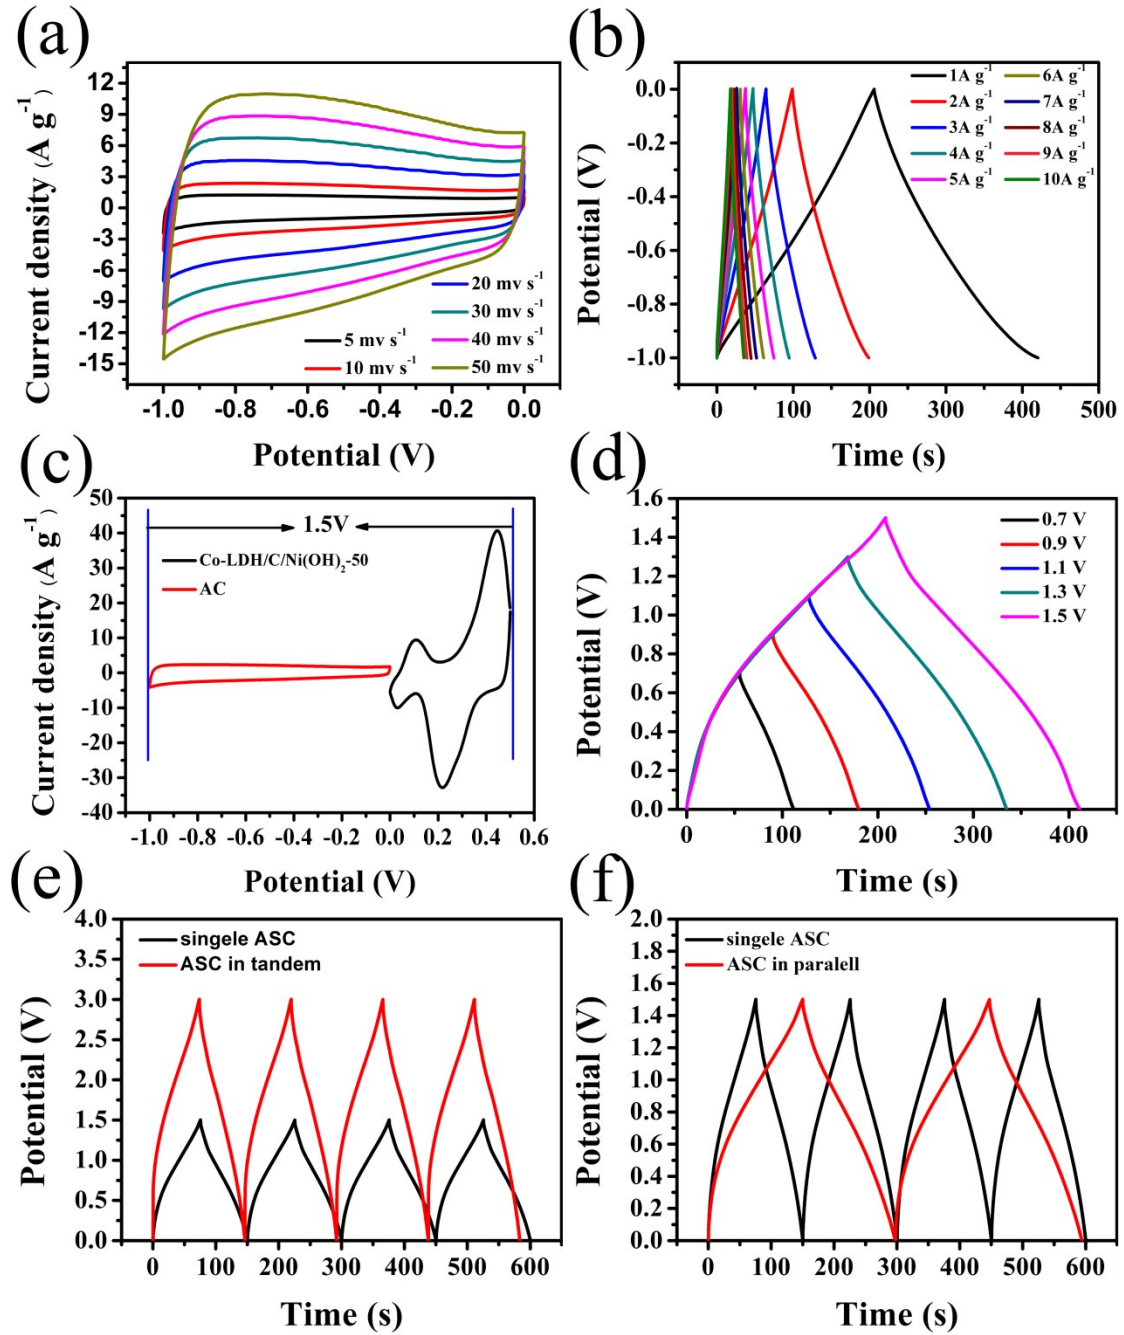

Fig. S12. (a) CV curves at various scan rates, (b) GCD profiles at various current densities for AC. (c) Cyclic voltammograms of AC and Co-Co LDH/C/Ni(OH)<sub>2</sub>-50 in three electrode configurations against SCE electrode showing corresponding operational voltage window. (d) GCD curve of Co-Co LDH/C/Ni(OH)<sub>2</sub>-50//AC Hybrid supercapacitor under different potential windows. Two pieces of Co-Co LDH/C/Ni(OH)<sub>2</sub>-50//AC (e) tandem and (f) parallel GCD curves compared to a single Co-Co LDH/C/Ni(OH)<sub>2</sub>-50//AC.

Table S1. Comparison of our work with previously reported work

| Electrode material                                    | Specific capacitance                            | Capacitance Retention                  | Cycling stability       | References |
|-------------------------------------------------------|-------------------------------------------------|----------------------------------------|-------------------------|------------|
| Ni(OH) <sub>2</sub> @Co/C                             | 952 F g <sup>-1</sup> at 0.5A g <sup>-1</sup>   | 80% (from 0.5-10 A g <sup>-1</sup> )   | —                       | [1]        |
| CNT@Ni(OH) <sub>2</sub>                               | 1251 F g <sup>-1</sup> at 1A g <sup>-1</sup>    | 78.4% (from 1-100 A g <sup>-1</sup> )  | 75% after 2000 cycles   | [2]        |
| Ni <sub>x</sub> Co <sub>1-x</sub> (OH) <sub>2</sub>   | 1000 F g <sup>-1</sup> at 5 mV s <sup>-1</sup>  | 69.9% (from 5-500 mV s <sup>-1</sup> ) | 100% after 1000 cycles  | [3]        |
| ZnCo <sub>2</sub> O <sub>4</sub> @Ni(OH) <sub>2</sub> | 1021 F g <sup>-1</sup> at 1 mA cm <sup>-2</sup> | 55.3% (from 1-10 mA cm <sup>-2</sup> ) | 50.1% after 5000 cycles | [4]        |
| Ni(OH) <sub>2</sub> /CoO/rGO                          | 1317 F g <sup>-1</sup> at 2 A g <sup>-1</sup>   | 66% (from 2-10 A g <sup>-1</sup> )     | 84.8% after 2000 cycles | [5]        |
| Ni(OH) <sub>2</sub> /a-GCA                            | 1342.5 F g <sup>-1</sup> at 1 A g <sup>-1</sup> | 78.4% (from 1-10 A g <sup>-1</sup> )   | 79% after 5000 cycles   | [6]        |
| Co-Co                                                 | 1426 F g <sup>-1</sup> at 1 A g <sup>-1</sup>   | 90.2% (from 1-10 A g <sup>-1</sup> )   | 81.1% after 3000 cycles | Our work   |
| LDH/C/Ni(OH) <sub>2</sub> -50                         |                                                 |                                        |                         |            |

## References:

- [1] X. Li, Y. Qiao, C. Wang, T. Shen, X. Zhang, H. Wang, Y. Li and W. Gao, *J. Alloy. Compd.*, 2019, **770**, 803-812.
- [2] Y. Yang, Y. Zhou, Y. An, Q. Zhang, X. Wang, X. Yang and Z. Hu, *J. Phys. Chem. Solids*, 2018, **119**, 126-137.
- [3] J.-C. Chen, C.-T. Hsu and C.-C. Hu, *J. Power Sources*, 2014, **253**, 205-213.
- [4] X. Han, Y. Yang, J.-J. Zhou, Q. Ma, K. Tao and L. Han, *Chem.-Eur. J.*, 2018, **24**, 18106-18114.
- [5] L. Jiang, R. Zou, W. Li, J. Sun, X. Hu, Y. Xue, G. He and J. Hu, *J. Mater. Chem. A*, 2013, **1**, 478-481.
- [6] Y. Zhang, W. Fan, H. Lu and T. Liu, *Electrochim. Acta*, 2018, **283**, 1763-1772.
